# Supplementary material for: Enhanced photoelectrochemical water splitting on novel nanoflake WO3 electrodes by dealloying of amorphous Fe–W alloys
Source: Royal Society of Chemistry journal article supplement (doi:10.1039/c3ta12273e), 2013-01-01
Supplement: c3ta12273e.pdf [file c3ta12273e.pdf]

Supplementary Information:

## Enhanced photoelectrochemical water splitting on novel nanoflake $\text{WO}_3$ electrodes by dealloying of amorphous Fe-W alloys

Jun Zhang<sup>a</sup>, Yunhan Ling<sup>a,\*</sup>, Wubin Gao<sup>a</sup>, Song Wang<sup>a</sup>, Jiangtao Li<sup>b</sup>

<sup>a</sup> Lab of Advanced Materials, School of Materials Science & Engineering, Tsinghua University, Beijing, 100084, P. R. China.

<sup>b</sup> Technical Institute of Physics and Chemistry, Chinese Academy of Sciences, Beijing 100190, P. R. China.

Corresponding author: [yhling@mail.tsinghua.edu.cn](mailto:yhling@mail.tsinghua.edu.cn)

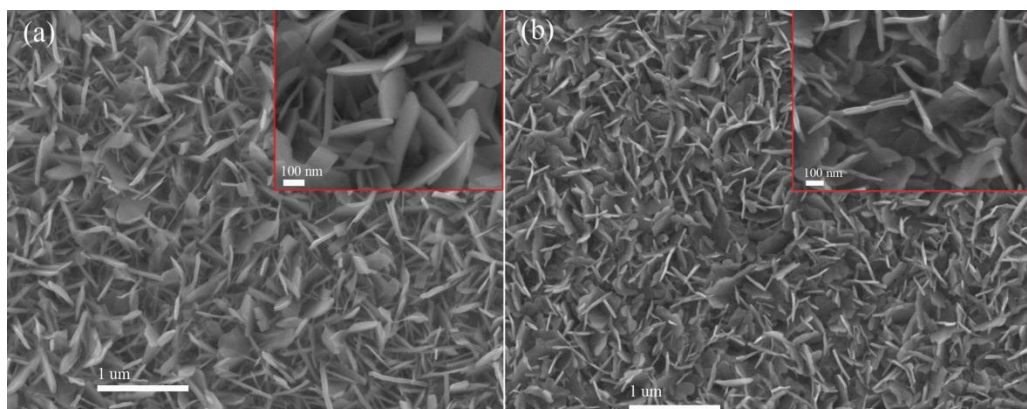

**Fig. S1** FESEM images of nanoflake before (a) and after (b) annealing treatment at 500 °C in air for 3 h. The nanoflake  $\text{WO}_3$  was obtained by dealloying the as-deposited amorphous Fe-W film in a dilute  $\text{HNO}_3$  solution (3.5 wt %) for 20 h at room temperature.

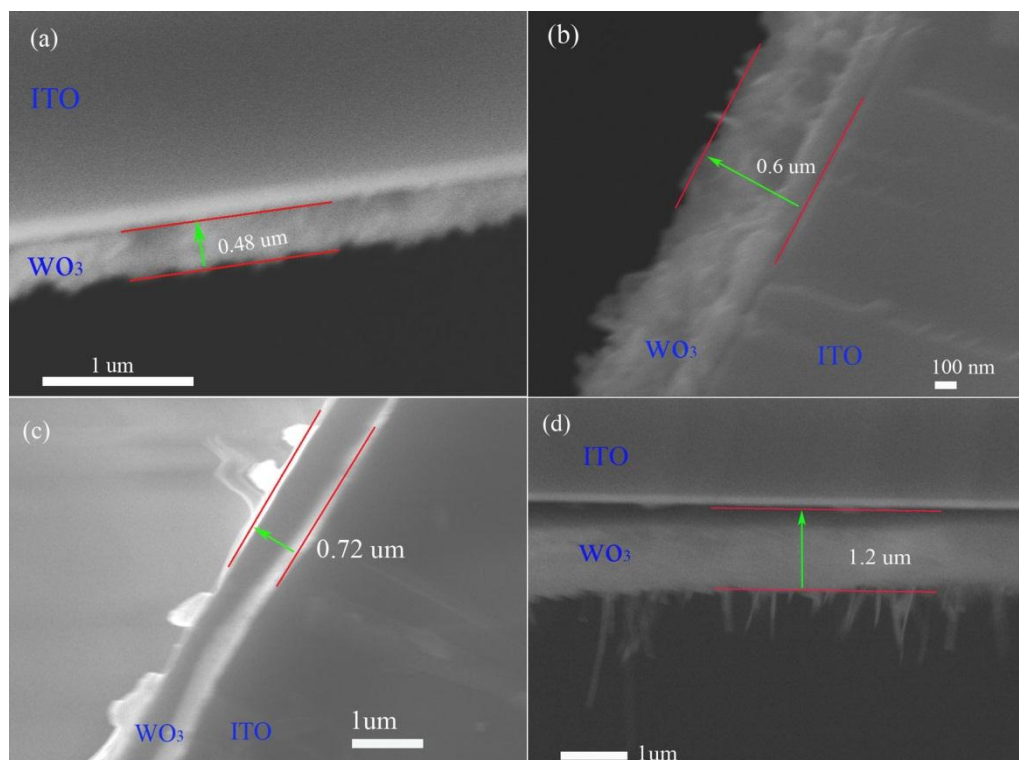

**Fig. S2** FESEM images of  $\text{WO}_3$  film prepared on ITO substrate. Images (a), (b), (c) and (d) correspond to sample 1, 2, 3 and 4, with electro-deposition duration of 75 s, 2 min, 4 min and 5 min, respectively.

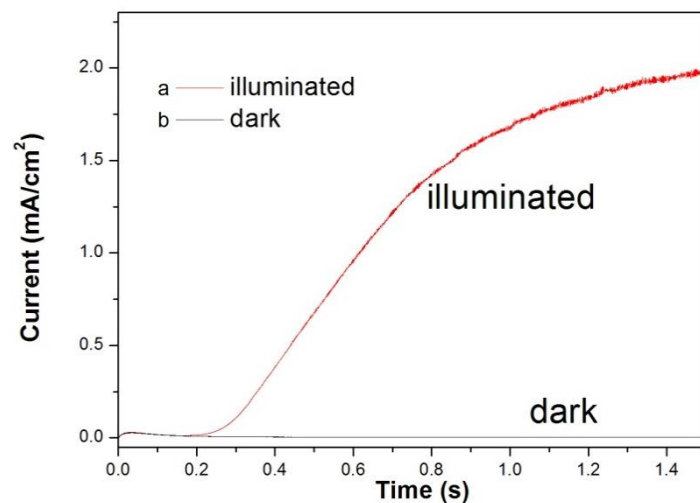

**Fig. S3** Photoelectrochemical current-potential curves for the sample which underwent the potentiostatic polarization measurement under dark and AM 1.5 solar light (100 mW/cm<sup>2</sup>) in H<sub>2</sub>SO<sub>4</sub> (0.5 M) on tungsten substrate.

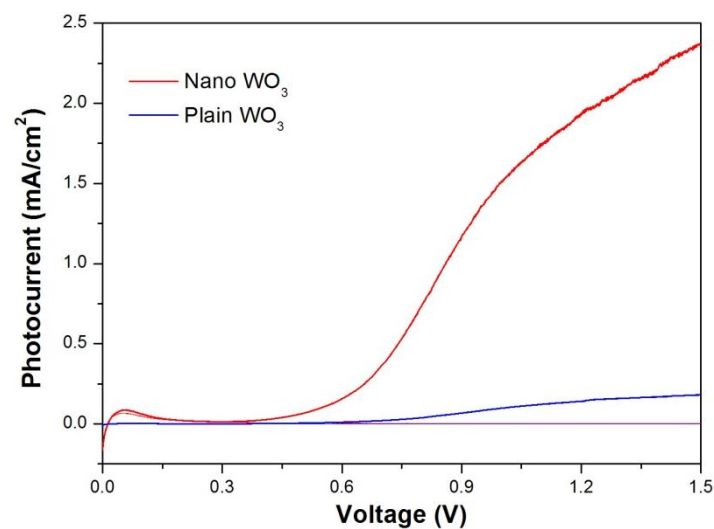

**Fig. S4** Photoelectrochemical current-potential curves for nanoflake and plain WO<sub>3</sub> electrodes under dark and AM 1.5 solar light (100 mW/cm<sup>2</sup>) in HClO<sub>4</sub> (1 M) on tungsten substrate.
